# Supplementary material
Source: Springer Nature journal article supplement (https://www.springermedizin.de/resource/supplementary/12887_2012_809_MOESM4_ESM.pdf/9476288)

## Complementary/replacement feeding

■ 3 Months

■ 6 Months

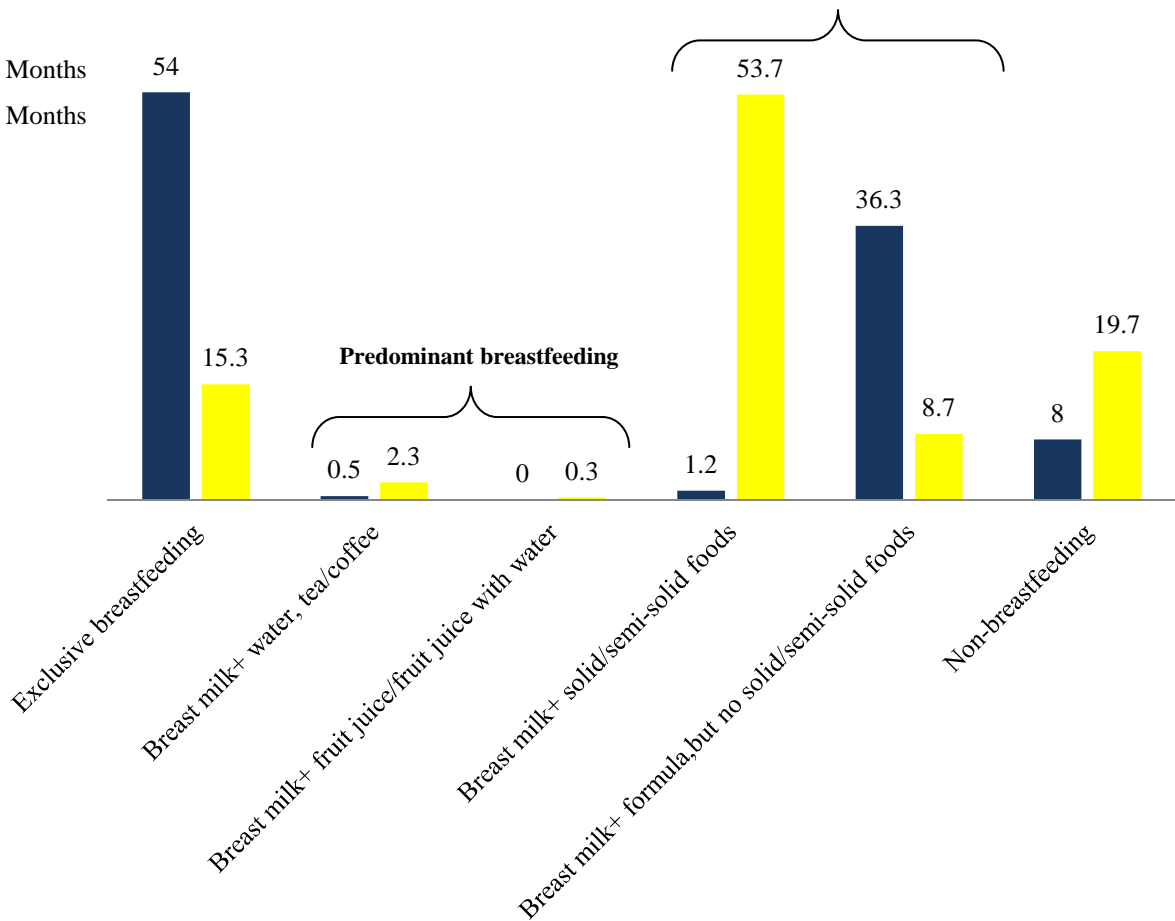

Supplement: MOESM4 [file 9476288]
